# Supplementary material for: Unequal bonding in Ag–CuIn3Se5-based solid solutions responsible for reduction in lattice thermal conductivity and improvement in thermoelectric performance
Source: Royal Society of Chemistry journal article supplement (doi:10.1039/c8ra00316e), 2018-01-01
Supplement: c8ra00316e1.pdf [file c8ra00316e1.pdf]

Supporting information

**Unequal bonding in Ag-CuIn<sub>3</sub>Se<sub>5</sub>-based solid solutions responsible for reduction in lattice thermal conductivity and improvement in thermoelectric performance**

Jiaolin Cui,<sup>a\*</sup> Yufu Lu,<sup>a,b</sup> Shaoping Chen,<sup>b</sup> Xianglian Liu,<sup>a</sup> Zhengliang Du<sup>a</sup>

Jiaolin Cui, Xianglian Liu, Zhengliang Du: School of Materials & Chemical Engineering, Ningbo University of Technology, Ningbo 315016, China

Yufu Lu, Shaoping Chen: Materials Science and Engineering College, Taiyuan University of Technology, Taiyuan, 030024, China.

Corresponding author's contact information:

**Jiaolin Cui:**

School of Materials and Chemical Engineering, Ningbo University of Technology, Ningbo 315211, China

E-mail: [cuijiaolin@163.com](mailto:cuijiaolin@163.com)

Tel: 86-574-87080504

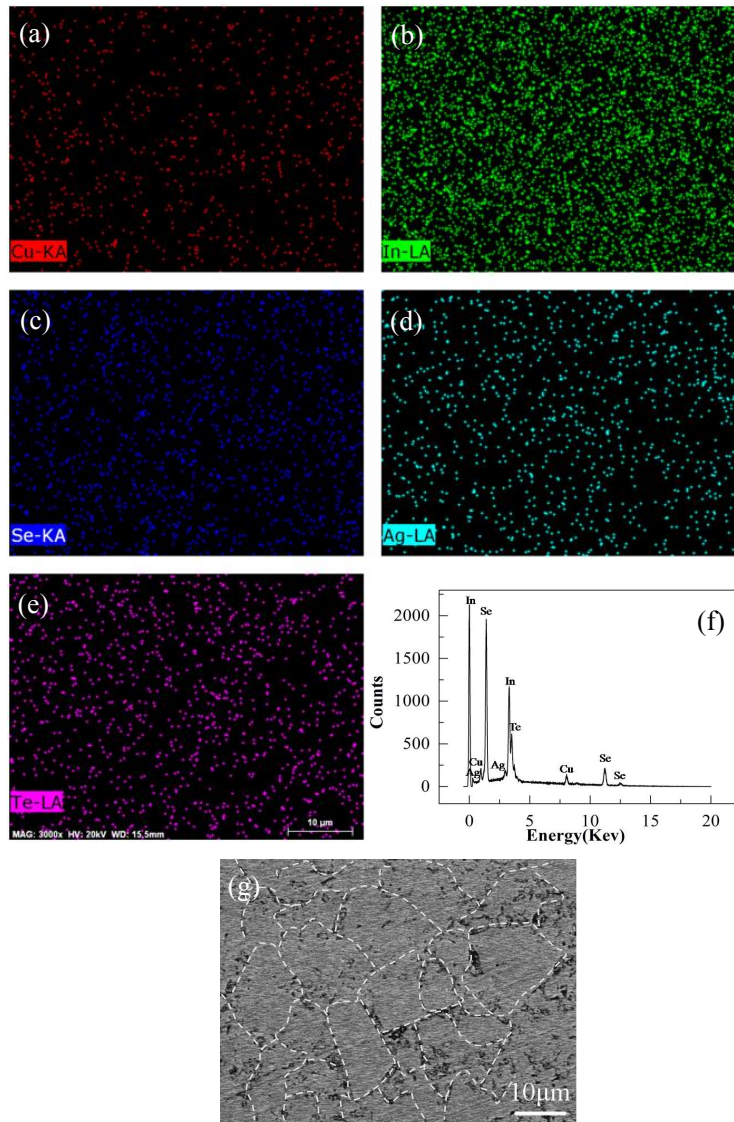

Fig.S1 (a-e) EPMA mapping of five elements, Cu, In, Se, Ag and Te on polished  $\text{Cu}_{0.8}\text{Ag}_{0.2}\text{In}_3\text{Se}_{4.9}\text{Te}_{0.1}$  surface; (f) A SEM image, where an average grain size of 10~15  $\mu\text{m}$  was observed; (g) EDAX analysis of the chemical compositions.

Table S1 The chemical compositions of the sample  $\text{Cu}_{0.8}\text{Ag}_{0.2}\text{In}_3\text{Se}_{4.9}\text{Te}_{0.1}$  determined using EDAX.

| Composition                                                               | Cu   | In   | Se   | Te   | Ag   |
|---------------------------------------------------------------------------|------|------|------|------|------|
| $\text{Cu}_{0.8}\text{Ag}_{0.2}\text{In}_3\text{Se}_{4.9}\text{Te}_{0.1}$ | 0.81 | 2.95 | 4.90 | 0.06 | 0.17 |

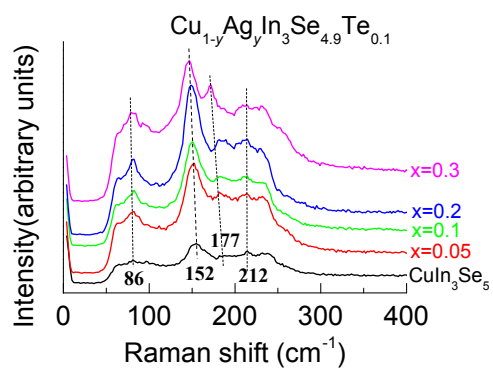

Fig. S2 Raman spectra of  $\text{Cu}_{1-y}\text{Ag}_y\text{In}_3\text{Se}_{4.9}\text{Te}_{0.1}$  ( $y=0.05, 0.1, 0.2$  and  $0.3$ ) samples. The Raman spectrum of  $\text{CuIn}_3\text{Se}_5$  is presented for comparison.
